# Supplementary material for: A Minimal Physiologically Based Pharmacokinetic Model to Characterize CNS Distribution of Metronidazole in Neuro Care ICU Patients
Source: MDPI journal article supplement (doi:10.3390/antibiotics11101293), 2022-09-22
Supplement: s1 [file s1]

Supplementary

# A Minimal Physiologically Based Pharmacokinetic Model to Characterize CNS Distribution of Metronidazole in Neuro Care ICU Patients

Alexia Chauzy <sup>1</sup>, Salim Bouchène <sup>2</sup>, Vincent Aranzana-Climent <sup>1</sup>, Jonathan Clarhaut <sup>1,3</sup>, Christophe Adier <sup>1,3</sup>, Nicolas Grégoire <sup>1,3</sup>, William Couet <sup>1,3</sup>, Claire Dahyot-Fizelier <sup>1,4</sup> and Sandrine Marchand <sup>1,3,\*</sup>

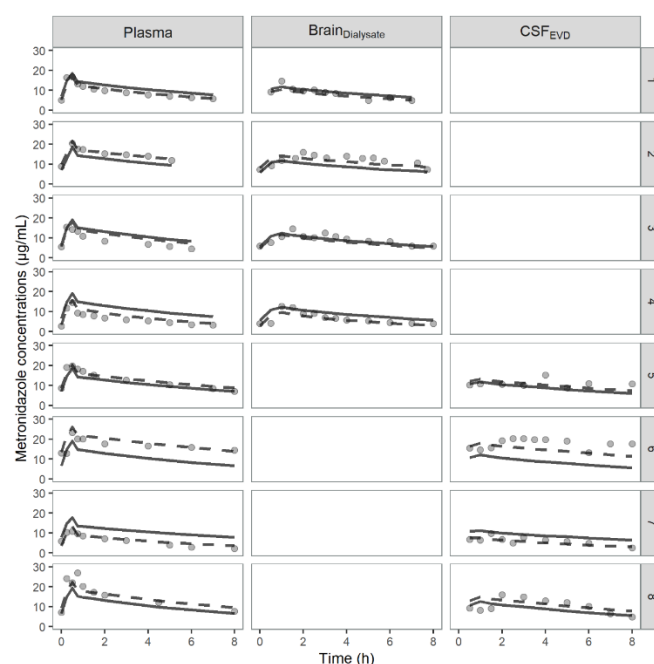

**Figure S1.** Metronidazole concentration-time profiles in plasma, brain dialysates after correction by *in vivo* probe recovery (Brain<sup>Dialysate</sup>) and collection bag of the EVD (CSF<sup>EVD</sup>) after the administration of 500 mg q8h. The circles represent the observed data, the dashed lines the individual predictions and the solid lines the population predictions.

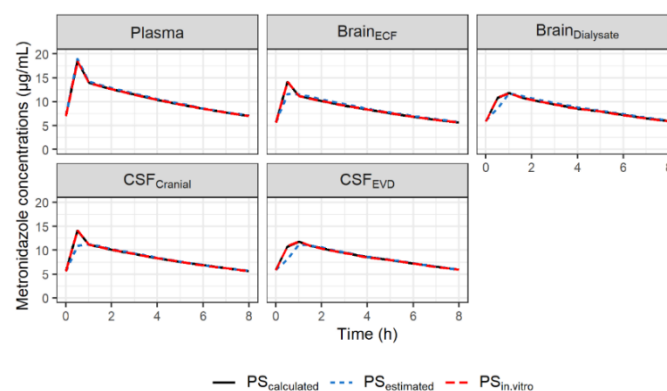

**Figure S2.** Predicted concentration-time profiles of metronidazole in plasma, brain ECF, brain dialysates after correction by *in vivo* probe recovery, CSF in the lateral ventricle (CSF<sup>LV</sup>) and CSF collected by extra-ventricular drainage (CSF<sup>EVD</sup>), for a typical patient after administration of 500 mg q8h. The black lines correspond to model predictions from permeability values (PS<sub>ECF/CSF</sub>) calculated from system- and drug-specific parameters by Simcyp (PS<sub>calculated</sub>), the blue dashed lines are model

predictions from  $PS_{ECF/CSF}$  estimated by the model ( $PS_{estimated}$ ) and the red dashed lines are model predictions from  $PS_{ECF/CSF}$  scaled from *in vitro* Caco-2 permeability parameters ( $PS_{in vitro}$ ).

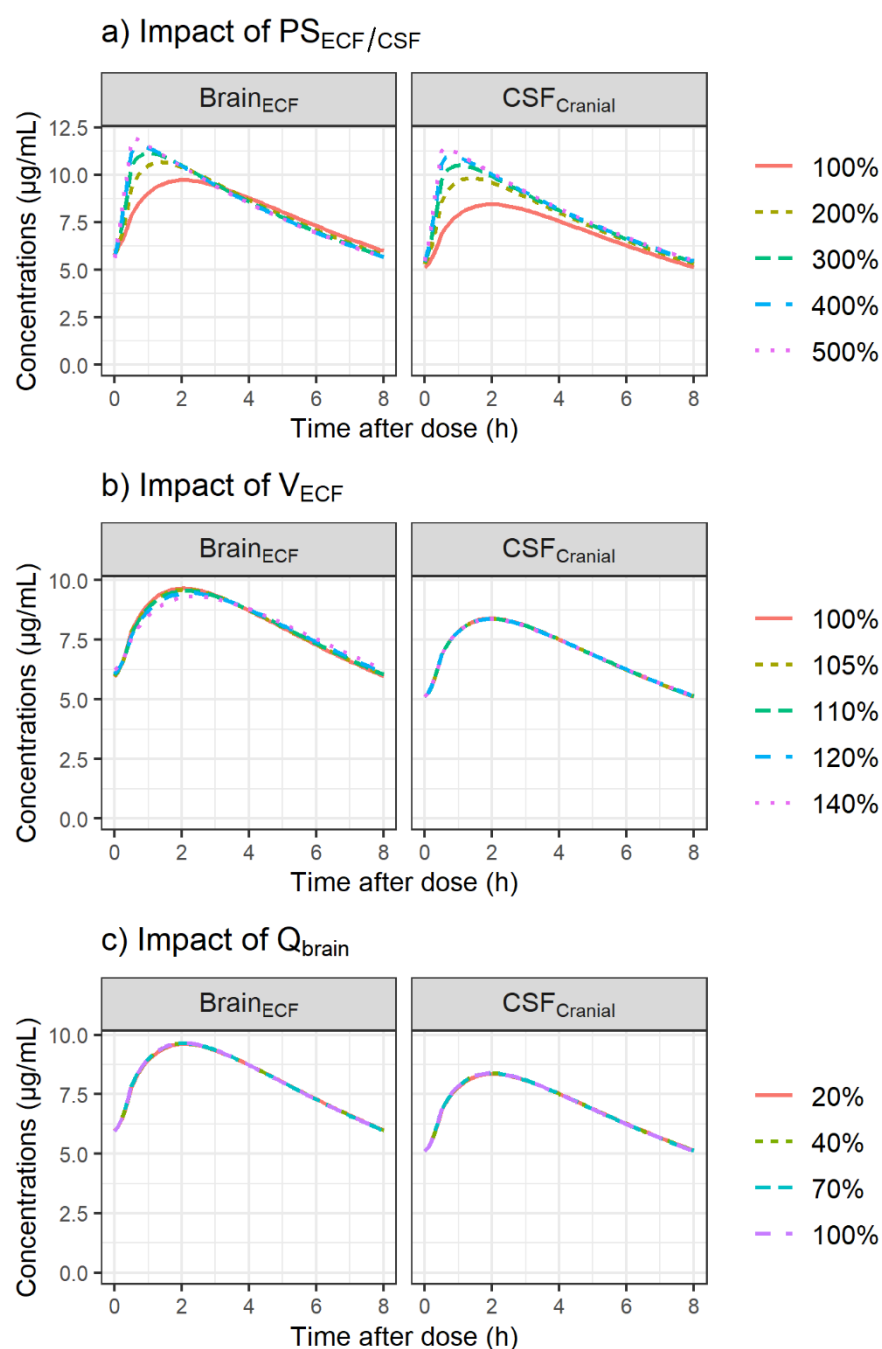

**Figure S3.** Simulation of the impact of increased passive diffusion clearances,  $PS_{ECF/CSF}$  (a), increased brain ECF volume,  $V_{ECF}$  (b) and reduced cerebral blood flow,  $Q_{brain}$  (c) on CNS PK profiles of an hypothetical drug with low permeability using the minimal PBPK model. The plots were stratified by the CNS compartments (panels).

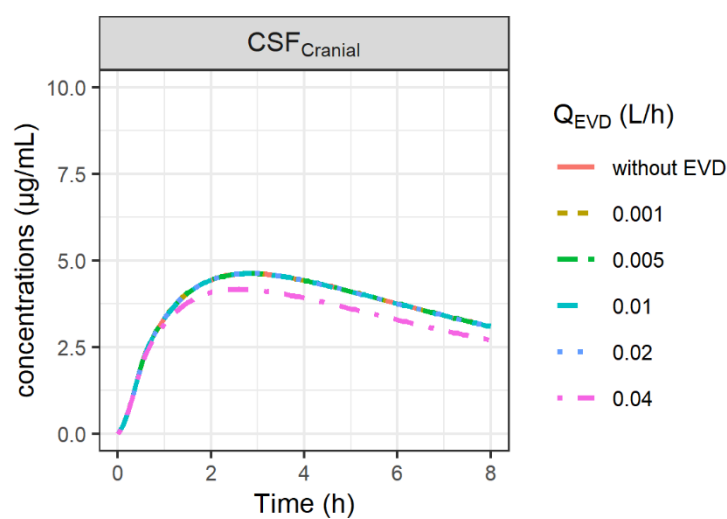

**Figure S4.** Simulation of the impact of external ventricular drain flow ( $Q_{EVD}$ ) on CSF concentrations of an hypothetical drug with low permeability.  $Q_{EVD}$  was assumed to be constant over time and to restore the physiological CSF outflow ( $Q_{sink}$ ). Thus when  $Q_{EVD}$  was higher than the physiological value of  $Q_{sink}$  ( $Q_{EVD} > 0.024$  L/h),  $Q_{sink}$  was set at 0 L/h.

**Table S1.** Comparison between predicted and observed unbound AUCs between two consecutive dosing at steady-state ( $AUC_{\Delta t}$ ) in plasma, brain dialysate (BrainDialysate) and CSF collected by external ventricular drainage (CSFEVD).

| Patient         | $AUC_{\Delta t}$ ( $\mu\text{g/mL}\cdot\text{h}$ ) |           |                |           |          |           |
|-----------------|----------------------------------------------------|-----------|----------------|-----------|----------|-----------|
|                 | Plasma                                             |           | BrainDialysate |           | CSFEVD   |           |
|                 | Observed                                           | Predicted | Observed       | Predicted | Observed | Predicted |
| 1               | 68.0                                               | 70.6      | 59.5           | 56.3      | -        | 56.0      |
| 2               | 113.7                                              | 111.4     | 94.8           | 88.9      | -        | 88.4      |
| 3               | 57.4                                               | 78.0      | 71.0           | 62.3      | -        | 61.9      |
| 4               | 45.2                                               | 57.2      | 50.5           | 45.7      | -        | 45.4      |
| 5               | 96.0                                               | 100.5     | -              | 80.2      | 87.6     | 79.8      |
| 6               | 134.2                                              | 147.3     | -              | 117.6     | 140.4    | 116.9     |
| 7               | 52.9                                               | 50.0      | -              | 40.0      | 42.1     | 39.7      |
| 8               | 122.3                                              | 109.7     | -              | 87.6      | 82.1     | 87.1      |
| mean            | 86.2                                               | 90.6      | 68.9           | 72.3      | 88.1     | 71.9      |
| mean fold error |                                                    | 1.05      |                | 1.05      |          | 0.82      |

**Table S2.** Comparison of parameter values when PS values are calculated from system- and drug-specific parameters ( $PS_{\text{calculated}}$ ) using Simcyp or estimated by the model ( $PS_{\text{estimated}}$ ).

| Parameter                                         | $PS_{\text{calculated}}$    |                               | $PS_{\text{estimated}}$     |                               |
|---------------------------------------------------|-----------------------------|-------------------------------|-----------------------------|-------------------------------|
|                                                   | Value (95% CI) <sup>a</sup> | IIV %CV (95% CI) <sup>a</sup> | Value (95% CI) <sup>a</sup> | IIV %CV (95% CI) <sup>a</sup> |
| $K_p$                                             | 0.796 (0.693-0.923)         | -                             | 0.767 (0.671-0.888)         | -                             |
| $CL_{10}$ (L/h)                                   | 7.28 (5.77-9.53)            | 35.2 (24.0-57.8)              | 7.18 (5.60-9.16)            | 34.8 (24.2-52.9)              |
| <b>fd</b>                                         | 0.86 FIX <sup>b</sup>       |                               | 0.823 (0.616-0.976)         | -                             |
| $PS_{\text{ECF}}$ (L/h)                           | 6.4 FIX <sup>c</sup>        | -                             | 0.904 (0.560-1.87)          | -                             |
| $PS_{\text{CSF}}$ (L/h)                           | 3.2 FIX <sup>d</sup>        | -                             | 0.398 (0.175-1.06)          | -                             |
| $\sigma_{\text{prop,plasma}}$ (%)                 | 14.4 (9.74-19.1)            | -                             | 14.8 (11.0-19.3)            | -                             |
| $\sigma_{\text{add,plasma}}$ ( $\mu\text{g/mL}$ ) | 1.18 (0.320-2.90)           | -                             | 1.25 (0.364-2.57)           | -                             |
| $\sigma_{\text{prop,ECF}}$ (%)                    | 22.8 (17.5-29.1)            | -                             | 19.4 (14.8-26.4)            | -                             |
| $\sigma_{\text{prop,CSF}}$ (%)                    | 28.2 (22.0-36.5)            | -                             | 27.4 (21.2-35.9)            | -                             |

IIV: Inter-individual Variability; CV: Coefficient of Variation; CI: Confidence Interval; <sup>a</sup> The 95% CI was obtained by Sampling Importance Resampling. <sup>b</sup> Parameter fixed to the maximum allowed value due to identifiability issue; <sup>c</sup> Parameter fixed to the value predicted by Simcyp based on system (surface area of BBB) and drug-specific parameters (log P and molecular weight); <sup>d</sup>  $PS_{\text{CSF}}$  was assumed to be half of  $PS_{\text{ECF}}$ .

Table S3. EVD experimental data.

| Patient 1     |                      |                          |                           |                             |                          |
|---------------|----------------------|--------------------------|---------------------------|-----------------------------|--------------------------|
| Sampling time | Time interval<br>(h) | V <sub>EVD</sub><br>(mL) | Q <sub>EVD</sub><br>(L/h) | C <sub>EVD</sub><br>(µg/mL) | A <sub>EVD</sub><br>(µg) |
| 0-0.5h        | 0.5                  | 1.5                      | 0.003                     | 10.1                        | 15.2                     |
| 0.5-1h        | 0.5                  | 0.5                      | 0.001                     | 10.7                        | 5.36                     |
| 1-1.5h        | 0.5                  | 0                        | 0                         | 0                           | 0                        |
| 1.5-2h        | 0.5                  | 1.5                      | 0.003                     | 10.6                        | 15.8                     |
| 2-3h          | 1                    | 16                       | 0.016                     | 10.1                        | 161.3                    |
| 3-4h          | 1                    | 2.5                      | 0.0025                    | 15.2                        | 38.1                     |
| 4-5h          | 1                    | 9                        | 0.009                     | 8.81                        | 79.3                     |
| 5-6h          | 1                    | 13                       | 0.013                     | 11.0                        | 143                      |
| 6-7h          | 1                    | nd                       | nd                        | nd                          | nd                       |
| 7-8h          | 1                    | 19                       | 0.019                     | 10.7                        | 202                      |
| Total         |                      |                          |                           |                             | 660                      |
| Patient 2     |                      |                          |                           |                             |                          |
| Sampling time | Time interval<br>(h) | V <sub>EVD</sub><br>(mL) | Q <sub>EVD</sub><br>(L/h) | C <sub>EVD</sub><br>(µg/mL) | A <sub>EVD</sub><br>(µg) |
| 0-0.5h        | 0.5                  | 2.5                      | 0.005                     | 15.5                        | 38.8                     |
| 0.5-1h        | 0.5                  | 3.5                      | 0.007                     | 14.7                        | 51.4                     |
| 1-1.5h        | 0.5                  | 3                        | 0.006                     | 15.8                        | 47.3                     |
| 1.5-2h        | 0.5                  | 20                       | 0.040                     | 19.2                        | 385                      |
| 2-2.5h        | 0.5                  | 17                       | 0.034                     | 20.4                        | 346                      |
| 2.5-3h        | 0.5                  | 9                        | 0.018                     | 20.3                        | 183                      |
| 3-3.5h        | 0.5                  | 6                        | 0.012                     | 19.7                        | 118                      |
| 3.5-4h        | 0.5                  | 6                        | 0.012                     | 19.9                        | 119                      |
| 4-5h          | 1                    | 11                       | 0.011                     | 19.2                        | 211                      |
| 5-6h          | 1                    | 10                       | 0.010                     | 13.2                        | 132                      |
| 6-7h          | 1                    | 7                        | 0.007                     | 17.7                        | 124                      |
| 7-8h          | 1                    | 4.5                      | 0.0045                    | 17.7                        | 79.8                     |
| Total         |                      |                          |                           |                             | 1835                     |
| Patient 3     |                      |                          |                           |                             |                          |
| Sampling time | Time interval<br>(h) | V <sub>EVD</sub><br>(mL) | Q <sub>EVD</sub><br>(L/h) | C <sub>EVD</sub><br>(µg/mL) | A <sub>EVD</sub><br>(µg) |
| 0-0.5h        | 0.5                  | 4                        | 0.008                     | 6.85                        | 27.4                     |
| 0.5-1h        | 0.5                  | 4                        | 0.008                     | 6.28                        | 25.1                     |
| 1-1.5h        | 0.5                  | 5                        | 0.010                     | 9.66                        | 48.3                     |
| 1.5-2h        | 0.5                  | 8.5                      | 0.017                     | 6.68                        | 56.8                     |
| 2-2.5h        | 0.5                  | 4.5                      | 0.009                     | 4.99                        | 22.4                     |
| 2.5-3h        | 0.5                  | 4                        | 0.008                     | 7.80                        | 31.2                     |
| 3-3.5h        | 0.5                  | na                       | Na                        | na                          | na                       |
| 3.5-4h        | 0.5                  | 7                        | 0.014                     | 6.42                        | 44.9                     |
| 4-5h          | 1                    | 2                        | 0.002                     | 5.59                        | 11.2                     |
| 5-6h          | 1                    | 13                       | 0.013                     | 4.70                        | 61.1                     |
| 6-7h          | 1                    | 3                        | 0.003                     | .                           | na                       |
| 7-8h          | 1                    | 7                        | 0.007                     | 2.43                        | 17.0                     |
| Total         |                      |                          |                           |                             | 345                      |
| Patient 4     |                      |                          |                           |                             |                          |
| Sampling time | Time interval<br>(h) | V <sub>EVD</sub><br>(mL) | Q <sub>EVD</sub><br>(L/h) | C <sub>EVD</sub><br>(µg/mL) | A <sub>EVD</sub><br>(µg) |
| 0-0.5h        | 0.5                  | 6.5                      | 0.013                     | 9.23                        | 60.0                     |

---

|              |     |    |       |      |            |
|--------------|-----|----|-------|------|------------|
| 0.5-1h       | 0.5 | 5  | 0.010 | 8.14 | 40.7       |
| 1-1.5h       | 0.5 | 5  | 0.010 | 9.03 | 45.2       |
| 1.5-2h       | 0.5 | 3  | 0.006 | 16.0 | 48.1       |
| 2-3h         | 1   | 12 | 0.012 | 14.9 | 178.9      |
| 3-4h         | 1   | 15 | 0.015 | 12.9 | 193.7      |
| 4-5h         | 1   | 10 | 0.010 | 12.1 | 121.2      |
| 5-6h         | 1   | 15 | 0.015 | 10.1 | 151.9      |
| 6-7h         | 1   | 10 | 0.010 | 6.50 | 65.0       |
| 7-8h         | 1   | 6  | 0.006 | 4.91 | 29.4       |
| <b>Total</b> |     |    |       |      | <b>934</b> |

---
